# Supplementary material
Source: PubMed Central journal article supplement (PMC3133174)
Supplement: supp_193_10_2429__1.pdf [file supp_193_10_2429__1.pdf]

## SUPPLEMENTAL MATERIALS

### Supplemental Figure

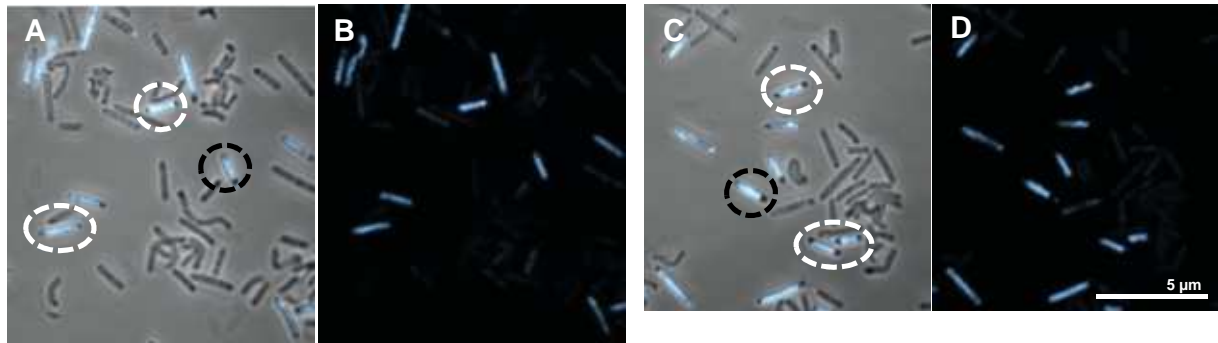

**FIG. S1.** FK01 *C. acetobutylicum* cells stained with DAPI. Image overlays of the phase-contrast images with the DAPI images (A & C). DAPI images (B & D). Dashed white circles indicate cells with two phase-dark areas on either pole of the cell. Dashed black circles indicate cells with a single phase-dark area at one pole of the cell. DAPI stains all cells, but stained some cells more than others.

**Table S1.** PCR primers.

| <b>Name</b>       | <b>Sequence (5' → 3')</b>       | <b>Description</b>                      |
|-------------------|---------------------------------|-----------------------------------------|
| RecU-Seq-F        | GCCGAAACATTCGGTTTCATCCCA        | Amplify region for sequencing           |
| RecU-Seq-R        | TCAACCTTTCGCACCAGATGATGG        | Amplify region for sequencing           |
| SigF-F            | TTTGAGAGATGACGGAATAAT           | Amplify <i>sigF</i> gene fragment       |
| SigF-R            | CAGCATATTTGCGACCTGAG            | Amplify <i>sigF</i> gene fragment       |
| SigF-KO-F         | GGTTGTATGGGACTCGTAAAGGCT        | Flanking confirmation primer            |
| SigF-KO-R         | TCCCTTATAGCCTTCAGTATTCTT        | Flanking confirmation primer            |
| SigF-probe-F      | TTTGAGAGATGACGGAATAA            | Amplify Southern probe                  |
| SigF-probe-R      | ACTGCATACTAGTAGTAGAT            | Amplify Southern probe                  |
| SpoIIA-F          | AAATTTCCGGGAAATTCTAGATAA        | Amplify <i>spoIIA</i> operon            |
| SpoIIA-R          | GTAGTTCCCTCCCTAGATATTTTT        | Amplify <i>spoIIA</i> operon            |
| SpoIIA-KI-F       | CCTTTGCCAAGAAGCTTGGAGAGAAC      | Flanking confirmation primer            |
| SpoIIA-KI-R       | TCTGAAACGAGCTGACCCACATCA        | Flanking confirmation primer            |
| TET-R             | AGATACCTGCGTTGCTTTGGTCTG        | Primer within Tet <sup>r</sup> cassette |
| TET-Seq-F         | TACTACCGGTGAACCTGTTTGCCA        | Amplify region for sequencing           |
| TET-Seq-R         | AGGAGCATCGTTGTATGCTCGTGA        | Amplify region for sequencing           |
| TH-F              | GGAATGGCGTGTGTGTTAGCCAAA        | Amplify Cm/Th <sup>r</sup> cassette     |
| TH-R              | TCACACAGGAAACAGCTATGACCA        | Amplify Cm/Th <sup>r</sup> cassette     |
| TH-frag-F         | AACCGCCATTCAGAGTTTAGGACG        | Amplify Cm/Th <sup>r</sup> fragment     |
| TH-frag-R         | CGGAGCATTGGCTTTCCCTCCAT         | Amplify Cm/Th <sup>r</sup> fragment     |
| CAC3571-F         | CCCAGGTAAACCAATAATGCCAGG        | Q-PCR housekeeping primer               |
| CAC3571-R         | GCTCCAAGTATAGGCTTCTTTCCC        | Q-PCR housekeeping primer               |
| <i>csfB</i> -F    | CTTGCATTATATGCAGAAAGCCTC        | Q-PCR primer for <i>csfB</i>            |
| <i>csfB</i> -R    | CCACATTGTAGCTTAACATACTCT        | Q-PCR primer for <i>csfB</i>            |
| <i>gpr</i> -F     | TATGCATAGATGCACTAGCCGCGA        | Q-PCR primer for <i>gpr</i>             |
| <i>gpr</i> -R     | CCAGGAGATATTCCAGTGTGCCA         | Q-PCR primer for <i>gpr</i>             |
| <i>spoIIP</i> -F  | AATGTATGTGCGGTGGGCGATGAA        | Q-PCR primer for <i>spoIIP</i>          |
| <i>spoIIP</i> -R  | GTGTTTACCTGAACGCGTATAAC         | Q-PCR primer for <i>spoIIP</i>          |
| <i>sigG</i> -F    | GGAATGGAAACACAACCTGCCAGAG       | Q-PCR primer for <i>sigG</i>            |
| <i>sigG</i> -R    | AGCCCTATACACCCAACCTGAA          | Q-PCR primer for <i>sigG</i>            |
| <i>spoIIAA</i> -F | TGGACAGCTCAGGAATTGGAGT          | Q-PCR primer for <i>spoIIAA</i>         |
| <i>spoIIAA</i> -R | GGTCCTACTACACATATACTACCGCC      | Q-PCR primer for <i>spoIIAA</i>         |
| <i>spoIIAB</i> -F | TTGCGTCAGAGCTTGATCCCACTT        | Q-PCR primer for <i>spoIIAB</i>         |
| <i>spoIIAB</i> -R | CCCTATTCCCTTCGTCCATAACCTC       | Q-PCR primer for <i>spoIIAB</i>         |
| <i>lonB</i> -F    | GCCGGTGTAAGTATTGCATGTGCT        | Q-PCR primer for <i>lonB</i>            |
| <i>lonB</i> -R    | TGCTGCCGCTGTAACCTTAGAACT        | Q-PCR primer for <i>lonB</i>            |
| <i>spoIIR</i> -F  | GCTAGCAAAGGTTGATTTCCCGGT        | Q-PCR primer for <i>spoIIR</i>          |
| <i>spoIIR</i> -R  | AACACAGCGCGGAAACATAACAC         | Q-PCR primer for <i>spoIIR</i>          |
| <i>spoIIE</i> -F  | GCAGTGAGTTTCAATTTGCTATAAGTAGAGT | Q-PCR primer for <i>spoIIE</i>          |
| <i>spoIIE</i> -R  | CCAACCAAACCTCCCACAGCTGCTAA      | Q-PCR primer for <i>spoIIE</i>          |

**Table S2.** Expression ratios<sup>a</sup> of sporulation-related genes in WT, FKO1, and FKO1-C C.

*acetobutylicum* strains.

|      | <i>spoIIAA</i><br>(CAC2308) | <i>spoIIAB</i><br>(CAC2307) | <i>spoIIIE</i><br>(CAC3205) |
|------|-----------------------------|-----------------------------|-----------------------------|
| Hour | FKO1/WT                     | FKO1/WT                     | FKO1/WT                     |
| 12   | 0.05                        | 0.05                        | 0.21                        |
| 24   | 0.33                        | 0.48                        | 1.91                        |
| 36   | 0.40                        | 0.54                        | 1.04                        |
| Hour | FKO1-C/WT                   | FKO1-C/WT                   | FKO1-C/WT                   |
| 12   | 1.12                        | 1.17                        | 0.70                        |
| 24   | 1.10                        | 1.11                        | 0.38                        |
| 36   | 0.83                        | 0.83                        | 0.15                        |

<sup>a</sup> Cycle threshold ( $C_t$ ) values from two biological replicates (with three technical replicates each) were averaged together ( $n = 6$ ). Fold differences were calculated using the housekeeping gene CAC3571.
